# Supplementary material for: Anatase/rutile TiO2 nanocomposite microspheres with hierarchically porous structures for high-performance lithium-ion batteries
Source: Royal Society of Chemistry journal article supplement (doi:10.1039/c2ra20962d), 2012-01-01
Supplement: c2ra20962d.pdf [file c2ra20962d.pdf]

**Supplementary Material (ESI) for RSC Advances**

**This journal is (c) The Royal Society of Chemistry 2012**

**Anatase/rutile TiO<sub>2</sub> nanocomposite microspheres with hierarchically porous structures for high-performance lithium-ion batteries**

**Junyao Shen,<sup>a,b</sup> Hai Wang,<sup>\*a,b</sup> Yu Zhou,<sup>a,b</sup> Naiqing Ye,<sup>a</sup> Guobao Li,<sup>\*c</sup> and Linjiang Wang<sup>\*a,b</sup>**

<sup>a</sup> State Key Laboratory Breeding Base of Nonferrous Metals and Specific Materials Processing, Guilin University of Technology, Guilin, 541004, P. R. China. Fax: +86-773-5896-671; Tel: +86-773-5896-672; E-mail: [hbwanghai@gmail.com](mailto:hbwanghai@gmail.com)

<sup>b</sup> Key Laboratory of New Processing Technology for Nonferrous Metal and Materials, Ministry of Education, Guilin University of Technology, Guilin 541004, P. R. China.

<sup>c</sup> Beijing National Laboratory for Molecular Sciences, Peking University, Beijing, 100871, China; E-mail: [liguobao@pku.edu.cn](mailto:liguobao@pku.edu.cn)

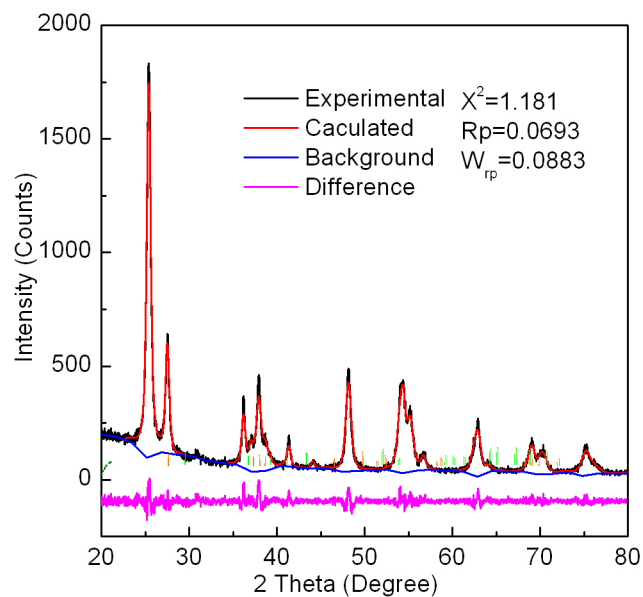

**Fig. S1.** XRD pattern and Rietveld analysis of ART nanocomposite microspheres. The difference spectrum is shown above. The lower vertical lines are the lines in the anatase and rutile standards, respectively.

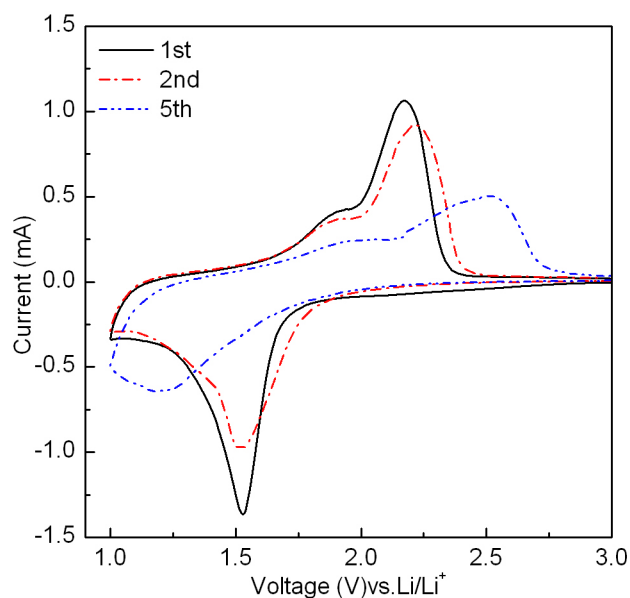

**Fig. S2** Representative CVs of the electrode made from as-prepared ART at a scan rate of  $0.2 \text{ mV s}^{-1}$  in the voltage range of 1-3 V versus  $\text{Li}^+/\text{Li}$  for the first, second, and fifth cycles.

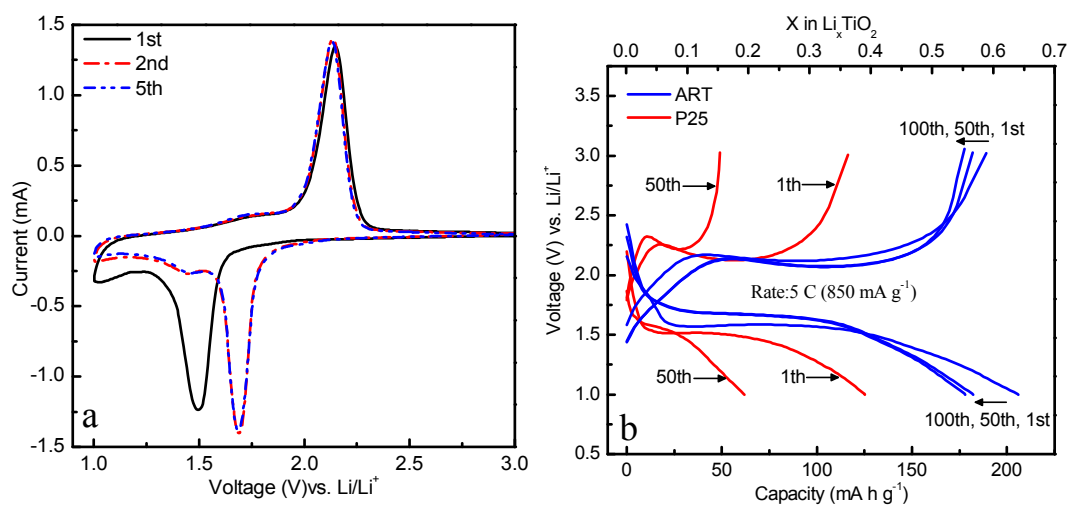

**Fig. S3** (a) CVs of the electrode made from ART at a scan rate of  $0.2 \text{ mV s}^{-1}$  in the voltage range of 1–3 V versus  $\text{Li}^+/\text{Li}$ . The 2nd and 5th cycles are superimposed. (b) Galvanostatic insertion and desorption curves of ART nanocomposite measured at a scan rate of 5 C after 1, 50, 80 and 100 cycles and P25 at 5 C for 50 cycles at 1–3 V versus  $\text{Li}^+/\text{Li}$ .
